# Supplementary material for: Raman on a disc: high-quality Raman spectroscopy in an open channel on a centrifugal microfluidic disc
Source: Royal Society of Chemistry journal article supplement (doi:10.1039/c6an00874g), 2017-01-01
Supplement: c6an00874g1.pdf [file c6an00874g1.pdf]

## Raman on a disc: High-quality Raman Spectroscopy in an Open Channel on a Centrifugal Microfluidic Disc

J. W. Martin<sup>1,2,4,5</sup>, M.K. Nieuwoudt<sup>1,2,4</sup>, M. Vargas<sup>1,2,4,5</sup>, O. Bodley<sup>2,4,5</sup>, T.S. Yohendiran<sup>2,4</sup>, R. Oosterbeek<sup>2,4,5</sup>, D. E. Williams<sup>1,4</sup> and M. C. Simpson<sup>†1,2,3,4,5</sup>

<sup>1</sup>*School of Chemical Sciences, The University of Auckland, Auckland, NZ*

<sup>2</sup>*The Photon Factory, The University of Auckland, Auckland, NZ*

<sup>3</sup>*Department of Physics, The University of Auckland, Auckland, NZ*

<sup>4</sup>*The MacDiarmid Institute for Advanced Materials and Nanotechnology, NZ*

<sup>5</sup>*The Dodd Walls Centre for Photonic and Quantum Technologies, NZ*

### Supplementary information

A bird's eye view of a segment of the disc showing more clearly the open channel design is given below (Figure S1).

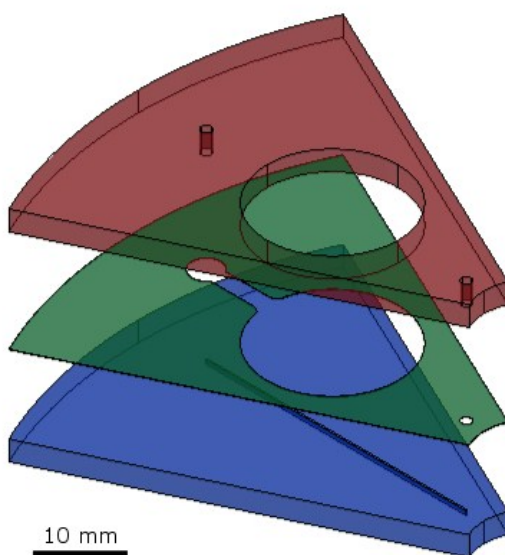

Figure S1. Bird's eye view of a segment of the disc showing the design of the different layers around the open channel.
